# Supplementary material
Source: Springer Nature journal article supplement (https://www.springermedizin.de/resource/supplementary/12904_2014_217_MOESM1_ESM.pdf/9517782)
Supplement: MOESM1 [file 9517782]

## Recipe for designing a decision aid

The key to designing a decision aid for advance care planning in a high-risk surgery setting is knowing the tools and ingredients to use to build it.

### Tools:

- Engage with patients
- Engage with surgeons
- Gauge the setting

### Ingredients:

- 1 part shift focus from end-of-life
- 1 part elicit patient values & goals
- 1 part prompt naming surrogate & having discussions

### Directions:

Mix together the ingredients while engaging with patients and surgeons to ensure that the aid meets their needs and to situate the aid in a conducive setting.

### Tips for success:

- Keep it simple
- Make it adaptable
- Show its effectiveness
